# Supplementary material for: Effectively raising the rate performance and cyclability of a graphite anode via hydrothermal modification with melamine and its electrochemical derivatives
Source: Royal Society of Chemistry journal article supplement (doi:10.1039/d2nj00394e), 2022-01-01
Supplement: d2nj00394e1.pdf [file d2nj00394e1.pdf]

### Supplementary Information:

## Effectively raising the rate performance and cyclability of graphite anode via hydrothermal modification with melamine and its electrochemical derivatives

Zong-Xiao Zhao<sup>1</sup>, Hui-Ling Zhu<sup>2</sup>, Wei Liu<sup>1</sup>, Yong-Xin Qi<sup>1</sup>, Tao Li<sup>\*1</sup> and Yu-Jun Bai<sup>\*1</sup>

<sup>1</sup>Key Laboratory of Liquid-Solid Structural Evolution and Processing of Materials of Ministry of Education, State Key Laboratory of Crystal Materials, Shandong University, Jinan, Shandong, 250061, PR China

<sup>2</sup>School of Materials Science and Engineering, Shandong University of Science and Technology, Qingdao, 266590, PR China

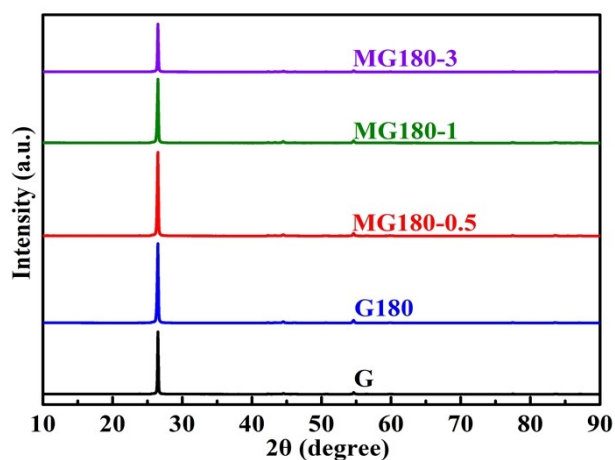

**Fig. S1** XRD patterns for G, G180, MG180-0.5, MG180-1 and MG180-3.

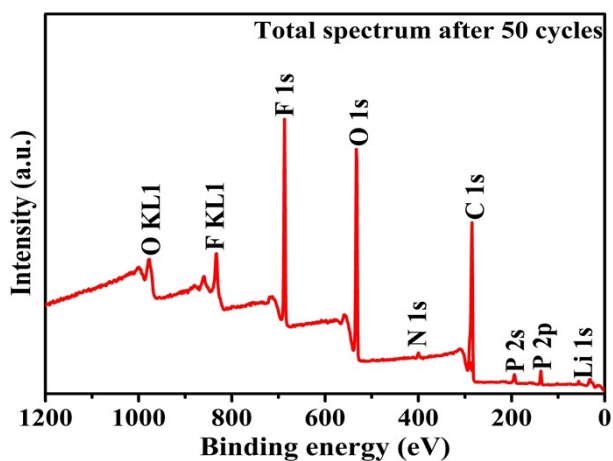

**Fig. S2** Total XPS spectrum for MG180-0.5 after 50 cycles.

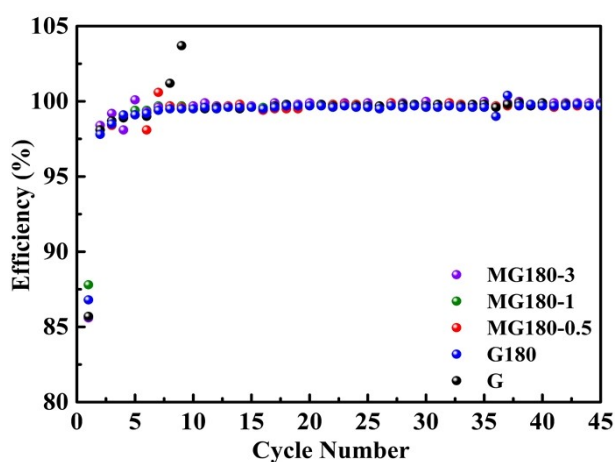

**Fig. S3** Coulombic efficiency of G, G180, MG180-0.5, MG180-1 and MG180-3 at various current rates.

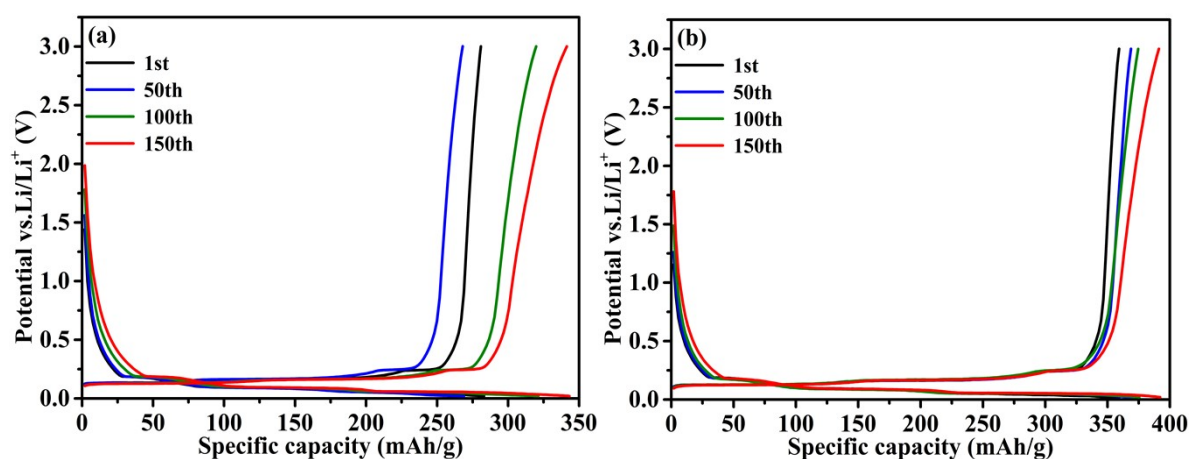

**Fig. S4** Lithiation/delithiation curves of the 1st, 50th, 100th and 150th cycles at 0.3 C for G (a), and MG180-0.5 (b).

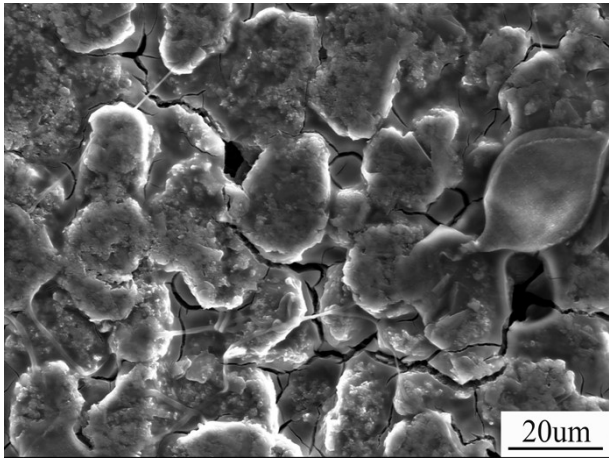

**Fig. S5** SEM image of MG180-3 after 50 cycles.
